# Supplementary material
Source: PubMed Central journal article supplement (PMC6619428)
Supplement: NIHMS1522154-supplement-1.pdf [file NIHMS1522154-supplement-1.pdf]

Supplemental Fig. 1.

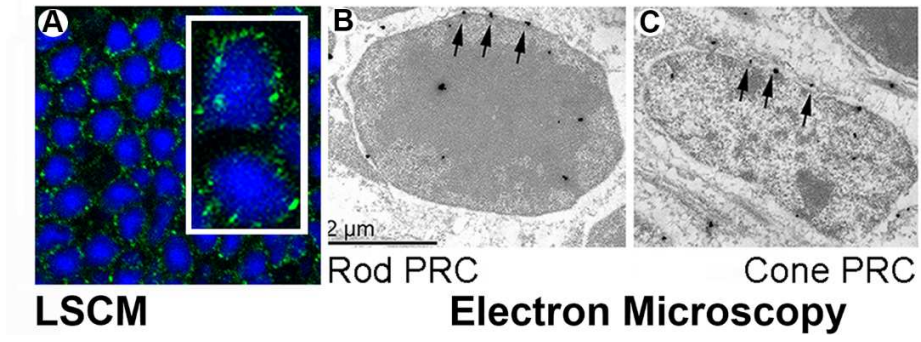

Supplemental Fig. 2.

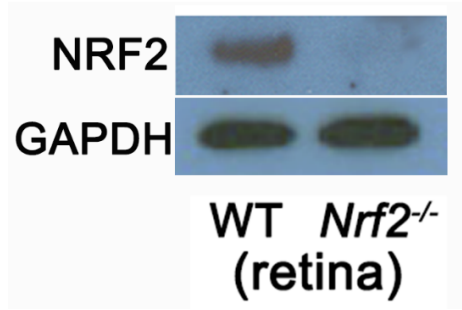

Supplemental Fig. 3

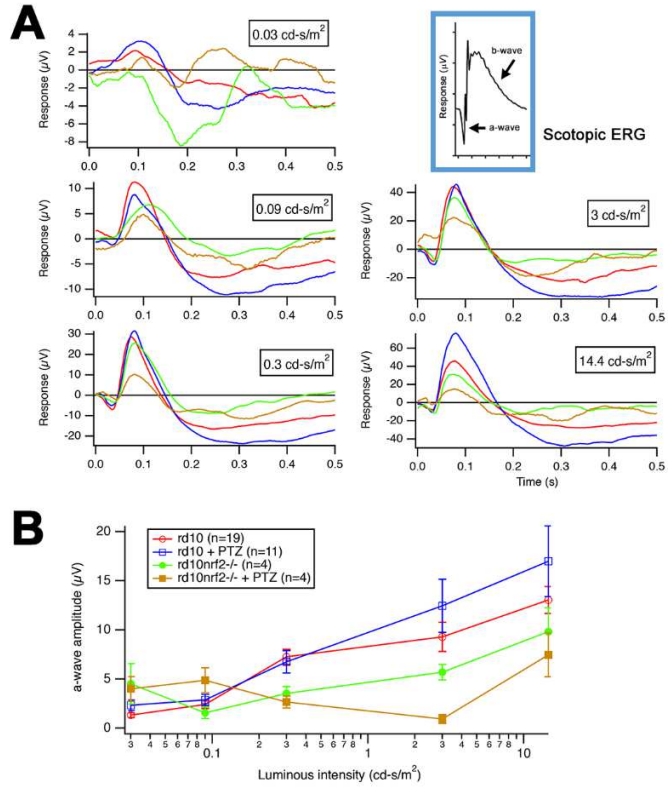

Supplemental Fig. 4

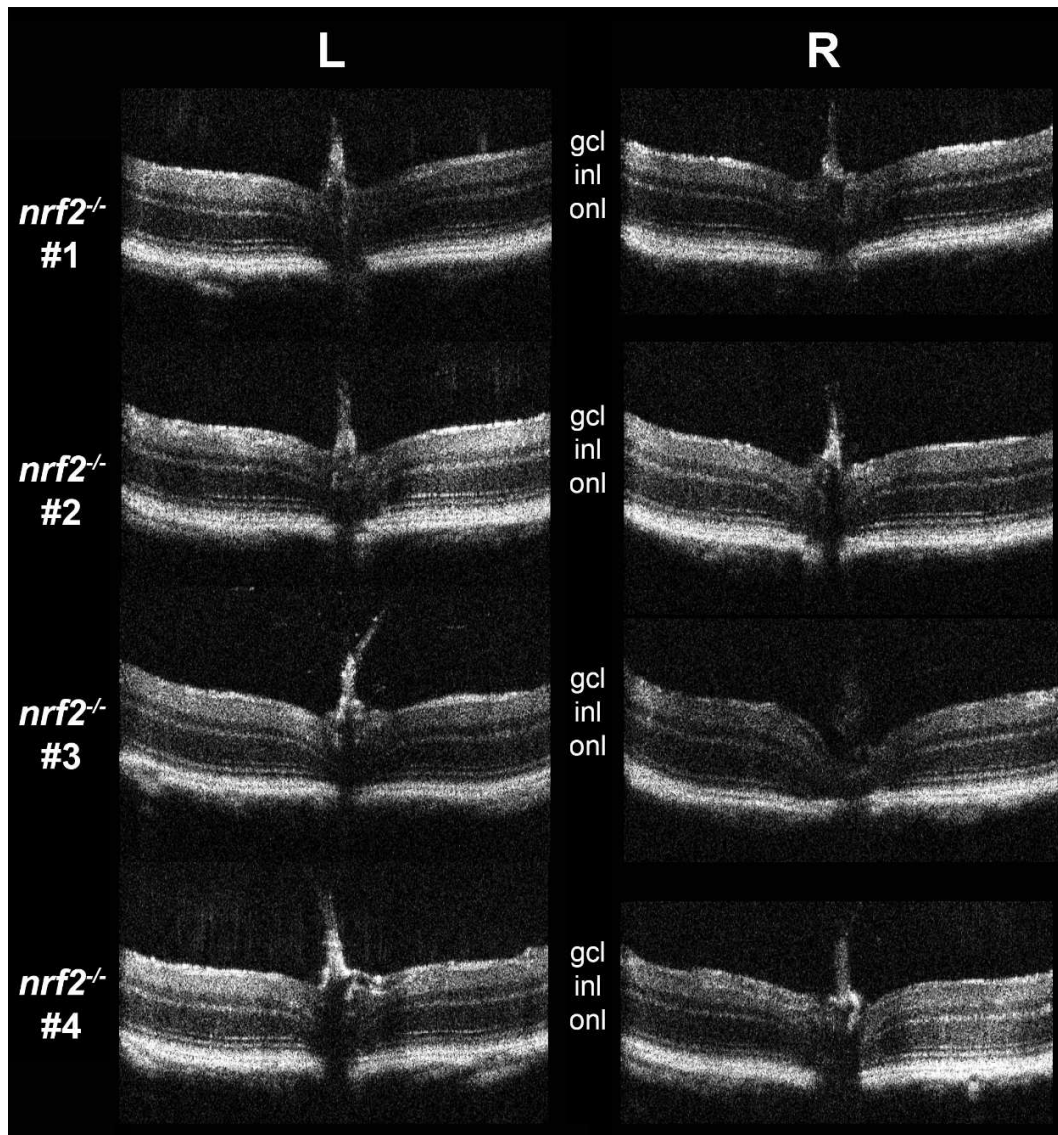

Supplemental Fig. 5

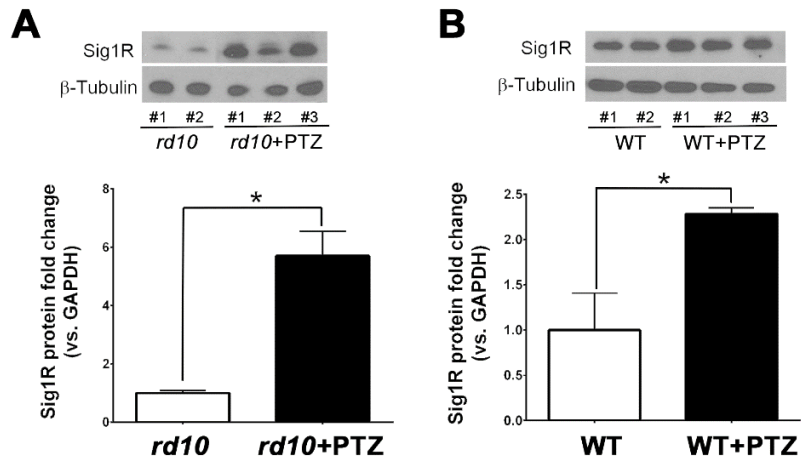

Supplemental Table 1. Numbers of animals used for retinal functional and structural analyses.

| <b>Mouse group</b>                                                             | <b>n</b> | <b>Age (post-natal days)</b> |
|--------------------------------------------------------------------------------|----------|------------------------------|
| <b><i>Immunolocalization of Sig1R (LSCM &amp; EM) &amp; immunoblotting</i></b> |          |                              |
| <i>C57BL6/J (wildtype)</i>                                                     | 9        | 35                           |
| <b><i>Verification of Nrf2 antibody</i></b>                                    |          |                              |
| <i>Nrf2<sup>-/-</sup></i>                                                      | 4        | 42                           |
| <b><i>ERG analysis of retinal function</i></b>                                 |          |                              |
| <i>Pde6βrd10</i> (no-(+)-PTZ)                                                  | 19       | 35                           |
| <i>Pde6βrd10</i> (0.5 mg kg <sup>-1</sup> (+)-PTZ)                             | 11       | 35                           |
| <i>Pde6βrd10/Nrf2<sup>-/-</sup></i> (no-(+)-PTZ)                               | 4        | 35                           |
| <i>Pde6βrd10/Nrf2<sup>-/-</sup></i> (0.5 mg kg <sup>-1</sup> (+)-PTZ)          | 4        | 35                           |
| <b><i>OCT analysis of retinal structure</i></b>                                |          |                              |
| <i>Pde6βrd10</i> (no-(+)-PTZ)                                                  | 12       | 42                           |
| <i>Pde6βrd10</i> (0.5 mg kg <sup>-1</sup> (+)-PTZ)                             | 11       | 42                           |
| <i>Pde6βrd10/Nrf2<sup>-/-</sup></i> (no-(+)-PTZ)                               | 7        | 42                           |
| <i>Pde6βrd10/Nrf2<sup>-/-</sup></i> (0.5 mg kg <sup>-1</sup> (+)-PTZ)          | 8        | 42                           |
| <i>Nrf2<sup>-/-</sup></i> (no-(+)-PTZ)                                         | 4        | 42                           |
| <b><i>Immunohistochemistry</i></b>                                             |          |                              |
| <i>Pde6βrd10</i> (no-(+)-PTZ)                                                  | 9        | 42                           |
| <i>Pde6βrd10</i> (0.5 mg kg <sup>-1</sup> (+)-PTZ)                             | 7        | 42                           |
| <i>Pde6βrd10/Nrf2<sup>-/-</sup></i> (no-(+)-PTZ)                               | 5        | 42                           |
| <i>Pde6βrd10/Nrf2<sup>-/-</sup></i> (0.5 mg kg <sup>-1</sup> (+)-PTZ)          | 5        | 42                           |
| <b><i>Morphometric analysis</i></b>                                            |          |                              |
| <i>Pde6βrd10</i> (no-(+)-PTZ)                                                  | 3        | 42                           |
| <i>Pde6βrd10</i> (0.5 mg kg <sup>-1</sup> (+)-PTZ)                             | 3        | 42                           |
| <i>Pde6βrd10/Nrf2<sup>-/-</sup></i> (no-(+)-PTZ)                               | 3        | 42                           |
| <i>Pde6βrd10/Nrf2<sup>-/-</sup></i> (0.5 mg kg <sup>-1</sup> (+)-PTZ)          | 4        | 42                           |
